# Supplementary material for: How right hemisphere damage after stroke can impair speech comprehension
Source: PubMed Central journal article supplement (PMC6262220; doi:10.1093/brain/awy270), 2018-11-09
Supplement: awy270_suppl_data.pdf [file awy270_suppl_data.pdf]

## SUPPLEMENTARY MATERIAL

**Supplementary Table 1.** Performance of the patients of interest across the 6 cognitive tasks of the CAT

| <b>Patient ID</b> | <b>Task 1 Av. score</b> | <b>Task 1</b> | <b>Task 2</b> | <b>Task 3</b> | <b>Memory Score</b> | <b>Task 4</b> | <b>Task 5</b> | <b>Task 6</b> |
|-------------------|-------------------------|---------------|---------------|---------------|---------------------|---------------|---------------|---------------|
| <b>1</b>          | 0.33                    | 53            | 48            | 60            | 54                  | 69            | 60            | 57            |
| <b>2</b>          | 0.00                    | 66            | 59            | 60            | 62                  | 70            | 60            | 65            |
| <b>3</b>          | -0.33                   | 53            | 43*           | 60            | 50                  | 69            | 55            | 44            |
| <b>4</b>          | -0.33                   | 53            | 59            | 60            | 62                  | 72            | 60            | 53            |
| <b>5</b>          | -0.33                   | 53            | 48            | 60            | 54                  | 67            | 68            | 57            |
| <b>6</b>          | 0.00                    | 66            | 48            | 60            | 54                  | 71            | 60            | 65            |
| <b>7</b>          | -0.5                    | 48            | 59            | 47*           | 50                  | 75            | 60            | 65            |
| <b>8</b>          | 0.16                    | 59            | 48            | 51            | 50                  | 70            | 68            | 53            |
| <b>9</b>          | 0.00                    | 66            | 59            | 60            | 62                  | 69            | 60            | 65            |

The table displays for every patient in the group of interest the test scores (i.e. T-scores) on the 6 cognitive tasks of the Comprehensive Aphasia Test. Memory score is a combined score from picture-to-picture semantic matching and recognition memory tasks. \* denotes impaired performance.

**Task 1 Av. Score** = represents the average deviance from the centre of the line for the line bisection task, which provides a quantitative description of normal (-0.5 to +0.5), mild (-1 to +1), or severe (-2 to +2) visual field defects (i.e. neglect). **Task 1** = Line bisection; **Task 2** = Picture-to-picture semantic matching; **Task 3** = Recognition memory; **Task 4** = Word fluency; **Task 5** = Gesture object use; **Task 6** = Arithmetic. Patient Numbers 1-9 refer to the following IDs in the PLORAS database: PS0316, PS0383, PS0448, PS0670, PS0870, PS1172, PS1211, PS1550 and PS2627.

**Supplementary Table 2.** Performance of the 9 patients of interest on 21 CAT tasks

| <b>Task</b>                   | <b>P1</b>  | <b>P2</b>  | <b>P3</b>  | <b>P4</b>  | <b>P5</b>  | <b>P6</b>  | <b>P7</b>  | <b>P8</b>  | <b>P9</b>  |
|-------------------------------|------------|------------|------------|------------|------------|------------|------------|------------|------------|
| Match aud word-to-pic         | 55         | 55         | 60         | 65         | 60         | 65         | 60         | 65         | 53         |
| Match aud sentence-to-pic     | <b>57*</b> | <b>58*</b> | <b>58*</b> | <b>58*</b> | <b>58*</b> | <b>58*</b> | <b>58*</b> | <b>60*</b> | <b>57*</b> |
| Match aud paragraphs          | 60         | 49         | 60         | 60         | 49         | 60         | 60         | 60         | 49         |
| Match written word-to-pic     | 55         | 59         | 65         | 65         | 65         | 65         | 59         | <b>51*</b> | <b>47*</b> |
| Match written sentence-to-pic | 62         | 64         | 62         | 65         | 65         | 64         | 67         | 59         | 62         |
| Repetition of heard words     | 57         | 57         | 57         | 65         | 57         | 57         | <b>56*</b> | 57         | 57         |
| Repetition of complex words   | 62         | 62         | 62         | 62         | 62         | 62         | 62         | 62         | 62         |
| Repetition of nonwords        | 55         | 53         | 67         | 67         | 55         | 53         | 62         | 67         | 67         |
| Repetition of digit strings   | 55         | 66         | 55         | 66         | 55         | 59         | 55         | 55         | 59         |
| Repetition of sentences       | 63         | 63         | 63         | 63         | 63         | 63         | 63         | 63         | 63         |
| Naming objects                | <b>60*</b> | 74         | 66         | 70         | 64         | 74         | 74         | 66         | <b>60*</b> |
| Naming actions                | 69         | <b>59*</b> | 69         | 69         | 69         | 69         | 69         | 59*        | 69         |
| Spoken picture description    | 66         | 62         | 62         | 72         | 74         | 61         | 66         | 68         | <b>58*</b> |
| Reading words                 | 69         | 62         | 64         | 62         | 69         | 69         | 62         | <b>57*</b> | 64         |
| Reading complex words         | 67         | 67         | 67         | 67         | 67         | 67         | 67         | <b>51*</b> | 67         |
| Reading function words        | 62         | 62         | 62         | 62         | 62         | 62         | 62         | 49         | 62         |
| Reading nonwords              | 68         | 68         | 61         | 64         | 68         | 68         | 68         | 58         | 68         |
| Copying letters               | 61         | 61         | 61         | 61         | 61         | 61         | 52         | 61         | 61         |
| Written picture naming        | 67         | 67         | 62         | 67         | 67         | 67         | 58         | 55         | 67         |
| Writing to dictation          | <b>57*</b> | 63         | 59         | 63         | 61         | 61         | 63         | <b>54*</b> | 68         |
| Written picture description   | 68         | 69         | 67         | 75         | 75         | 75         | 68         | <b>64*</b> | 70         |

The table displays for every patient in the group of interest the test scores (i.e. T-scores) on the 21 language tasks of the Comprehensive Aphasia Test. \* denotes impaired performance. Aud = auditory stimuli (heard speech); pic = picture.

**Supplementary Table 3.** The auditory sentence-to-picture matching task.

| <b>Sentence Number</b> | <b>Sentence Type</b> | <b>Number of predicates</b> | <b>Example</b>                         |
|------------------------|----------------------|-----------------------------|----------------------------------------|
| 1, 2, 3                | NP                   | 1                           | The woman is walking                   |
| 4, 5                   | NP VP NP A           | 2                           | The man is eating the apple            |
| 6                      | NP VP PP             | 2                           | The dog is sitting on the table        |
| 7                      | NP VP NP             | 2                           | The apple is under the shoe            |
| 8, 9, 12               | NP VP NP A           | 2                           | The singer hits the soldier            |
| 10, 11                 | NP VP NP P           | 2                           | The policeman is painted by the dancer |
| 13                     | NP (*PP) VP NP E     | 2                           | The shoe under the pencil is blue      |
| 14                     | NP(*clause) VP NP E  | 2                           | The carpet the cat is on is red        |
| 15                     | NP VP PP             | 2                           | The red pencil is under the shoe       |
| 16                     | NP (*PP) VP NP       | 1                           | The flower in the cup is blue          |

**Abbreviations:** NP = noun phrase, VP = verb phrase, PP = prepositional phrase, A = active sentence, P = passive sentence, E = embedded sentence, \* = post-modifying. Sentences 1-6 were non-reversible, sentences 7-16 were reversible.

**Supplementary Figure 1.** Examples of stimuli for each of the 10 conditions from Experiment 3, followed by factorial combinations of these tasks (Designs A, B and C) and the contrasts used to test the effects of interest (abbreviations on next page).

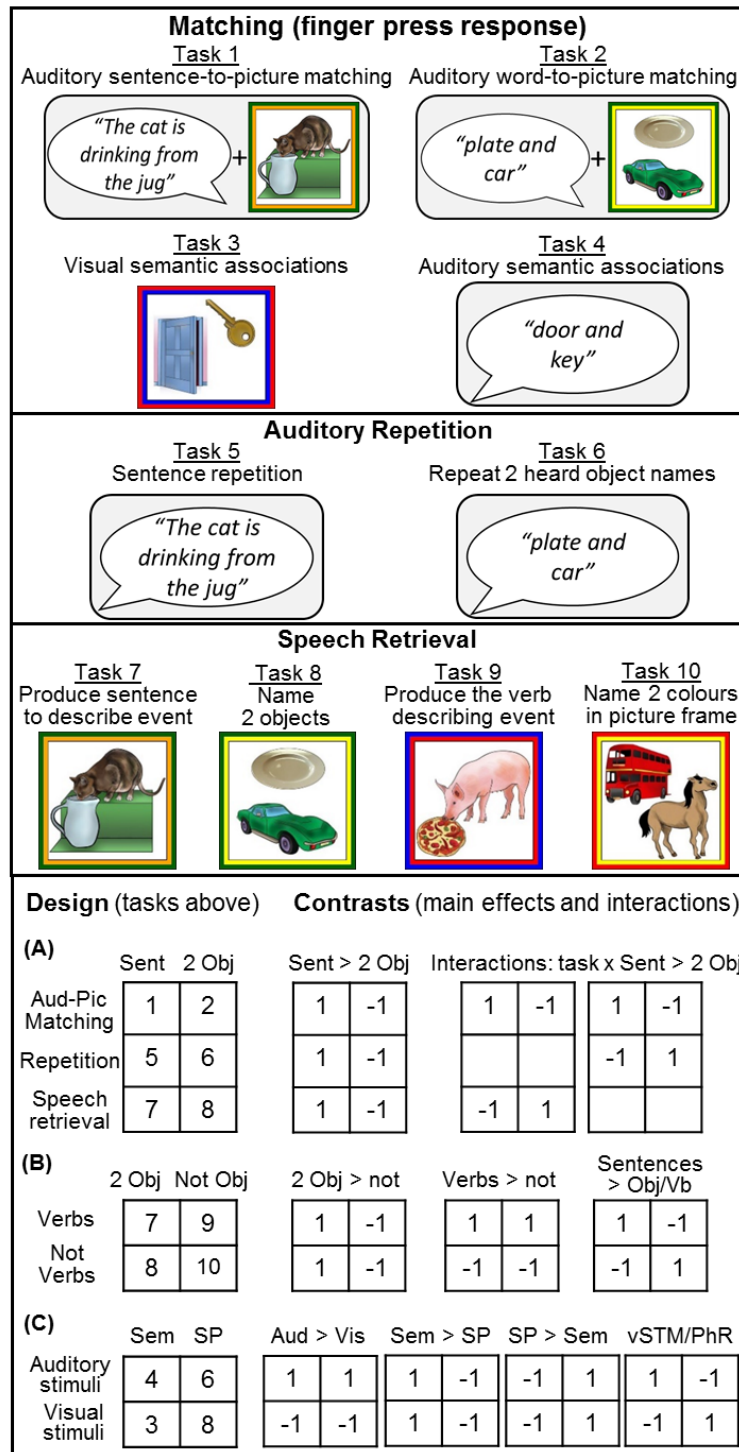

## **Key to Abbreviations in Supplementary Figure 1**

### **Design A**

- Aud-Pic Match = auditory speech-to-picture matching (sentences or 2 object names).
- Repetition = auditory repetition of sentences or 2 object names.
- Speech retrieval = producing a sentence to describe the interaction (event) between 2 objects in a picture or naming 2 unrelated objects.
- Sent = hearing or producing a sentence.
- 2 Obj = hearing 2 unrelated object names or seeing 2 unrelated objects in a picture.

### **Design B**

- Verbs = producing a sentence or a verb that describes the event between 2 objects (e.g. eating).
- Verbs > not = naming verb (or producing sentence) > object and colour naming.
- 2 Obj = naming two objects in a picture or a sentence describing the event between 2 objects.
- 2 Obj > not = naming 2 objects (unrelated or in event) > verb and colour naming.
- Sentences > Obj/Verbs = producing a sentence > naming objects or verbs without sentence.

### **Design C**

- Sem = semantic association of two objects in pictures (visual) or 2 heard object names (auditory).
- SP = speech production (naming objects in pictures, or repeating heard object names).
- Aud = auditory stimuli (e.g. 2 heard object names).
- Vis = visual stimuli (i.e. pictures of 2 unrelated objects).
- vSTM = verbal short-term memory (highest for semantic association on heard object names).
- PhR = phonological retrieval (highest when naming objects from pictures).

**Supplementary Figure 2.** Example stimuli from the CAT auditory sentence-to-picture matching task (A) and from the fMRI auditory sentence-to-picture matching task (B)

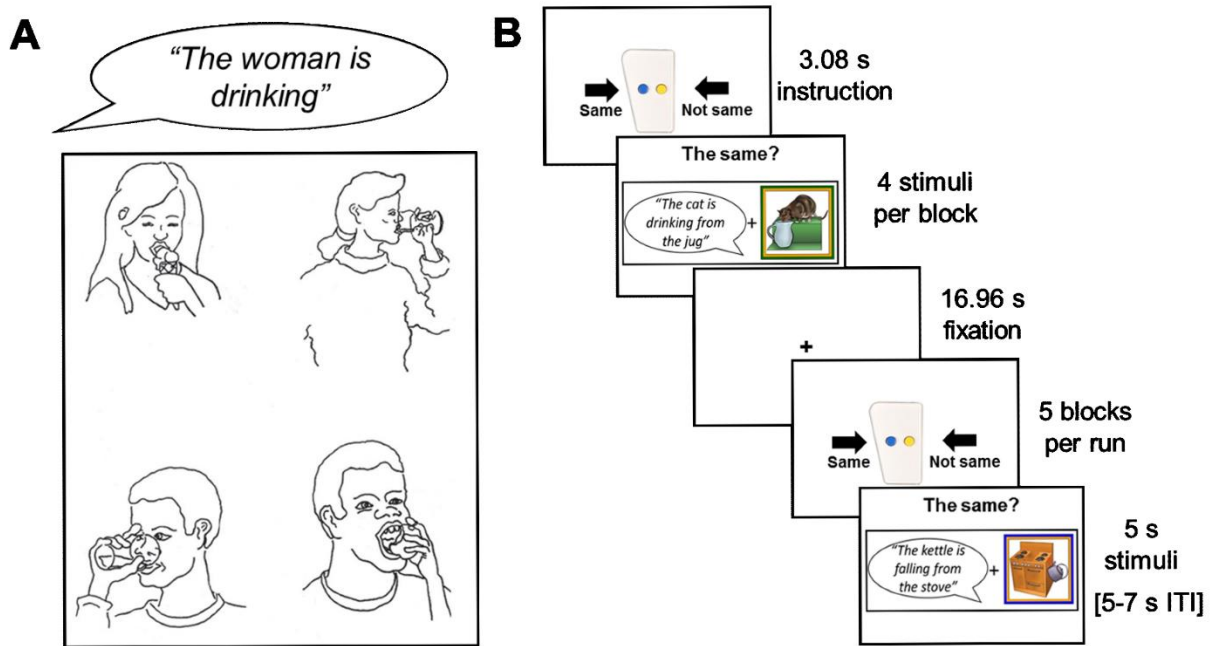

**(A)** The left panel shows sentence number 1 from the CAT auditory sentence-to-picture matching task. Patients were instructed to hear a sentence (produced by the examiner), and select the picture, from a set of 4, that best illustrates the sentence. The target sentence was “the woman is drinking” (right upper corner). **(B)** The right panel shows the fMRI auditory sentence-to-picture matching task (Experiment 3). Sentences in the bubble were presented aurally.

**Supplementary Figure 3.** Lesion overlap map of the full sample of 109 right hemisphere stroke patients

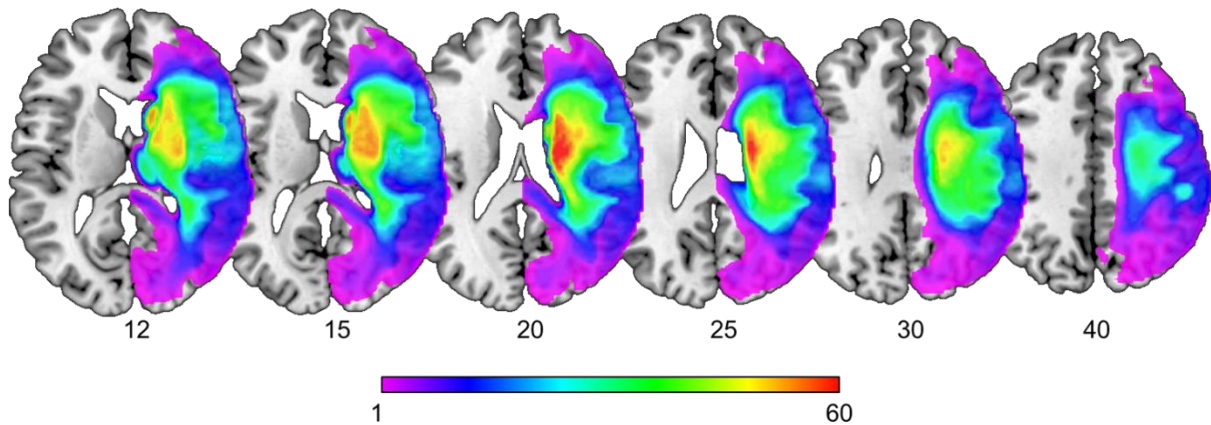

Lesion overlap map for the full sample of 109 stroke patients, depicting voxels that were damaged in a minimum of 1 and a maximum of 60 patients. The colour scale indicates the number of patients with overlapping lesions at each given voxel. The highest frequency of damage ( $\geq 50\%$  of patients) was observed in the periventricular white matter.

**Supplementary Figure 4.** Lesion overlap maps (A) and lesion difference map of the patients of interest minus the non-impaired control patients (B).

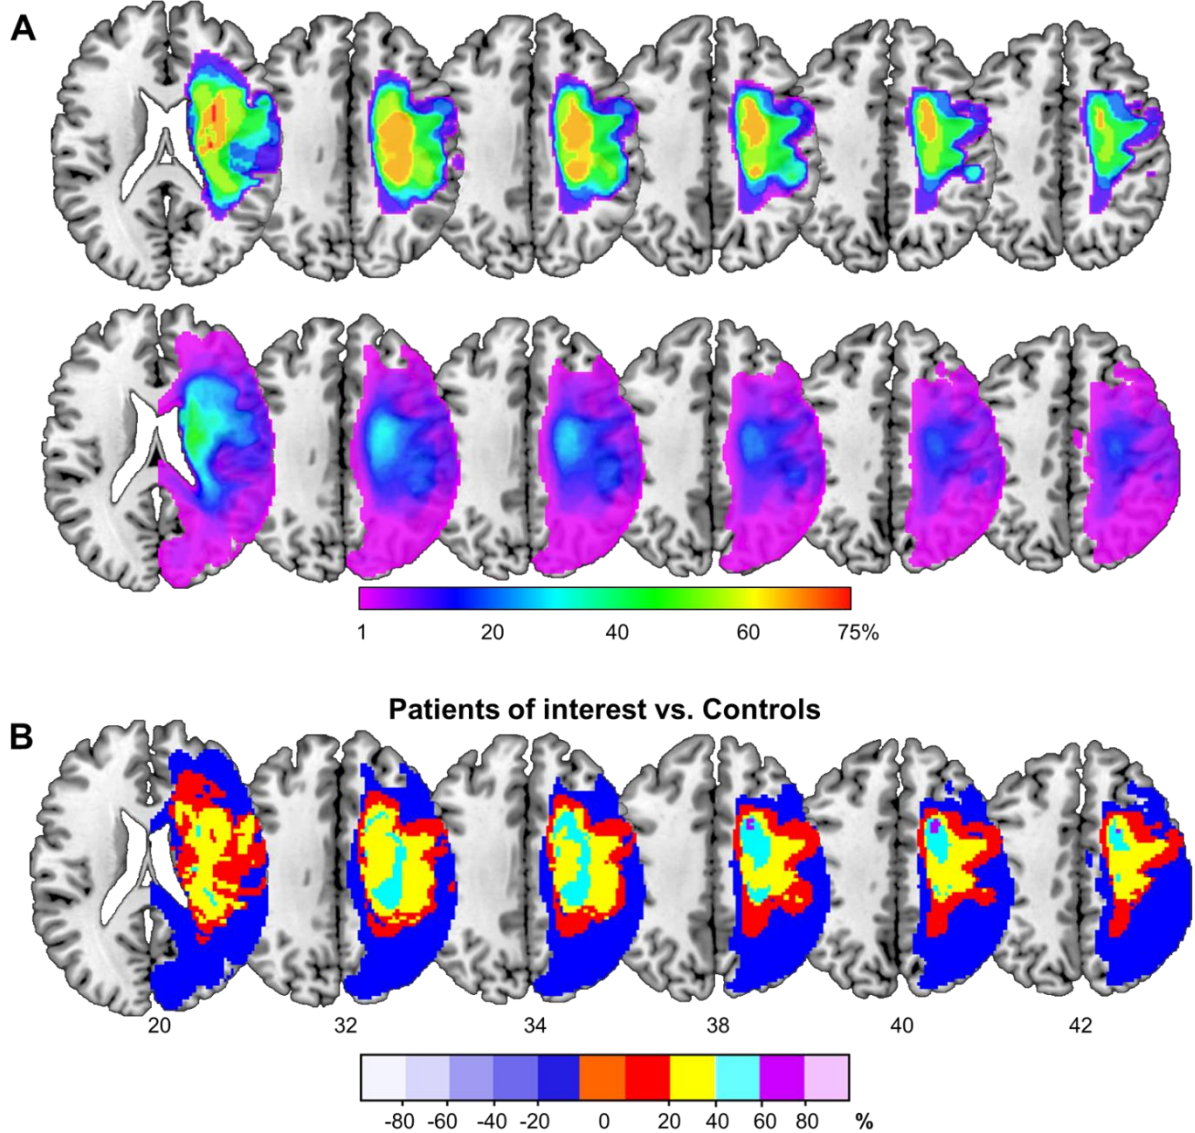

(A) The top and middle rows show the lesion overlap maps for the 9 patients of interest and the 75 non-impaired control patients, respectively. The colour bar on the bottom shows the percentage (0-75%) of patients who have a lesion including that particular voxel. The areas of maximum lesion overlap for the group of interest and the control group were: 7/9 (78%) and 42/75 (56%).

(B) The bottom row shows the lesion difference map for the images shown in part A (Karnath et al., 2004). The five different colours code increasing frequency differences (percent overlap in patients of interest – percent overlap in control patients) in 20% increments: (i) red = difference 1 to 20%; (ii) yellow = difference 21 to 40%; (iii) cyan = difference 41 to 60%; (iv) purple = difference 61 to 80% and (v) light pink = difference 81 to 100%.



## **References**

Karnath H-O, Fruhmann Berger M, Kuker W, Rorden C. The anatomy of spatial neglect based on voxelwise statistical analysis: a study of 140 patients. *Cereb Cortex*, 2004; 14:1164-72.
